# Supplementary material
Source: PubMed Central journal article supplement (PMC7941245)
Supplement: jamapediatr-e206735-s002.pdf [file jamapediatr-e206735-s002.pdf]

## Supplementary Online Content

Pernica JM, Harman S, Kam AJ, et al. Short-course antimicrobial therapy for pediatric community-acquired pneumonia: the SAFER randomized clinical trial. *JAMA Pediatr*. Published online March 8, 2021. doi: 10.1001/jamapediatrics.2020.6735

**eTable 1.** Baseline Characteristics (Per-Protocol Population)

**eTable 2.** Subgroup Analyses of Primary Outcome by Subgroups: Age, Salivary CRP, and Detection of Virus/*Mycoplasma* Species

**eTable 3.** Subgroup Analyses of Secondary Outcomes (Binary)

**eTable 4.** Subgroup Analyses of Secondary Outcomes (Count)

This supplementary material has been provided by the authors to give readers additional information about their work.

eTable 1. Baseline Characteristics (Per-Protocol Population)

|                                                              | Short course<br>(intervention)<br>N=122 | Standard course<br>(control)<br>N=114 |
|--------------------------------------------------------------|-----------------------------------------|---------------------------------------|
| Female sex; n(%)                                             | 56(46.7)                                | 39(34.2)                              |
| Missing                                                      | 2                                       | 0                                     |
| Age (year); median (Q1,Q3)                                   | 2.52(1.57,4.42)                         | 2.37(1.57,5.12)                       |
| Missing                                                      | 1                                       | 0                                     |
| Respiratory rate at admission (breaths per minute); mean(sd) | 30.6(9.05)                              | 31.4(10.9)                            |
| Missing                                                      | 5                                       | 2                                     |
| Pneumonia reported by radiologist; n(%)                      | 86(70.5)                                | 87(76.3)                              |
| Baseline salivary CRP, pg/mL                                 | 15.3(7.30,73.3)                         | 15.2(7.14,69.9)                       |
| Missing                                                      | 62                                      | 51                                    |
| Baseline NPS positive for a respiratory virus*; n(%)         |                                         |                                       |
| RSV                                                          | 21(23.6)                                | 25(26.6)                              |
| Rhino/enterovirus                                            | 16(18.0)                                | 13(16.5)                              |
| Metapneumovirus                                              | 12(13.5)                                | 7(8.9)                                |
| Influenza                                                    | 6(6.7)                                  | 5(6.3)                                |
| Parainfluenza                                                | 7(7.9)                                  | 4(5.1)                                |
| Adenovirus                                                   | 4(4.5)                                  | 5(6.3)                                |
| Negative for all                                             | 31(34.8)                                | 28(35.4)                              |
| Missing                                                      | 33                                      | 35                                    |
| Baseline NPS positive for <i>Mycoplasma</i> ; n(%)           | 4(4.65)                                 | 5(6.49)                               |
| Missing                                                      | 36                                      | 37                                    |

\*column percentages add to more than 100% since individuals can have more than one virus

eTable 2. Subgroup Analyses of Primary Outcome by Subgroups: Age, Salivary CRP, and Detection of Virus/*Mycoplasma* Species

| Outcome             | Subgroup                                 | N   | Short Course<br>(Intervention)<br>n/N(%) | Standard Course<br>(Reference)<br>n/N(%) | Risk difference<br>(95%CI) | Interaction<br>p |
|---------------------|------------------------------------------|-----|------------------------------------------|------------------------------------------|----------------------------|------------------|
| Clinical cure; n(%) | Age                                      |     |                                          |                                          |                            | 0.25             |
|                     | 5-10years                                | 62  | 19/27(70.4)                              | 30/35(85.7)                              | -0.12(-0.33,∞)             |                  |
|                     | <5 years                                 | 189 | 88/98(89.8)                              | 76/91(83.5)                              | 0.056(-0.037,∞)            |                  |
|                     | Salivary CRP                             |     |                                          |                                          |                            | 0.83             |
|                     | Higher ≥30                               | 52  | 20/24(83.3)                              | 22/28(78.6)                              | 0.016(-0.21,∞)             |                  |
|                     | Lower <30                                | 76  | 33/36(91.7)                              | 34/40(85.0)                              | 0.071(-0.071,∞)            |                  |
|                     | Detection of virus/<br><i>Mycoplasma</i> |     |                                          |                                          |                            | 0.15             |
|                     | Detected                                 | 122 | 57/62(91.9)                              | 50/60(83.3)                              | 0.086(-0.030,∞)            |                  |
|                     | Not detected                             | 52  | 23/26(88.5)                              | 24/26(92.3)                              | -0.039(-0.20,∞)            |                  |

eTable 3. Subgroup Analyses of Secondary Outcomes (Binary)

| BINARY outcomes                                                                          |                                          |            |                                          |                                          |                         |               |
|------------------------------------------------------------------------------------------|------------------------------------------|------------|------------------------------------------|------------------------------------------|-------------------------|---------------|
| Outcome                                                                                  | Subgroup                                 | N          | Short Course<br>(Intervention)<br>n/N(%) | Standard Course<br>(Reference)<br>n/N(%) | Risk Difference (95%CI) | Interaction p |
| Clinical cure not requiring additional intervention                                      | Age                                      |            |                                          |                                          |                         | 0.71          |
|                                                                                          | 5-10years                                | 62         | 23/27(85.2)                              | 31/35(88.6)                              | -0.029(-0.029,∞)        |               |
|                                                                                          | <5 years                                 | 186        | 92/96(95.8)                              | 82/90(91.1)                              | 0.044(-0.028,∞)         |               |
|                                                                                          | Salivary CRP                             |            |                                          |                                          |                         | 0.59          |
|                                                                                          | Higher                                   | 52         | 20/24(83.3)                              | 25/28(89.3)                              | -0.049(-0.049,∞)        |               |
|                                                                                          | Lower                                    | 76         | 36/36(100.0)                             | 37/40(92.5)                              | 0.089(-0.25,∞)          |               |
|                                                                                          | Detection of virus/<br><i>Mycoplasma</i> |            |                                          |                                          |                         | 0.12          |
|                                                                                          | Detected                                 | 120        | 60/61(98.4)                              | 53/64(82.81)                             | 0.081(-∞,0.20)          |               |
|                                                                                          | Not detected                             | 51         | 22/29(75.86)                             | 25/29(86.21)                             | -0.10(-∞,0.097)         |               |
| Adherence to study medications                                                           | Age                                      |            |                                          |                                          |                         | 0.13          |
|                                                                                          | 5-10years                                | 66         | 23/29(79.3)                              | 33/37(89.2)                              | -0.16(-0.42, 0.11)      |               |
|                                                                                          | <5 years                                 | 200        | 98/105(93.3)                             | 81/95(85.2)                              | 0.088(0.0069, 0.17)     |               |
|                                                                                          | Salivary CRP                             |            |                                          |                                          |                         | 0.622         |
|                                                                                          | Higher                                   | 57         | 25/28(89.3)                              | 26/29(89.7)                              | 0.015 (-0.18, 0.20)     |               |
|                                                                                          | Lower                                    | 81         | 35/37(94.6)                              | 37/44(84.1)                              | 0.087(-0.10, 0.28)      |               |
|                                                                                          | Detection of virus/<br><i>Mycoplasma</i> |            |                                          |                                          |                         | 0.645         |
|                                                                                          | Detected                                 | 125        | 62/64(96.9)                              | 54/61(88.5)                              | 0.084(-0.0071, 0.17)    |               |
|                                                                                          | Not detected                             | 56         | 27/28(96.4)                              | 24/28(85.7)                              | 0.18(0.012,0.32)        |               |
| Recurrence of respiratory illness after primary outcome visit but before 30-day followup | Age                                      |            |                                          |                                          |                         |               |
|                                                                                          | 5-10years                                | 62         | 2/27(7.41)                               | 0/35                                     | 0.066(-0.29, 0.42)      | 0.459         |
|                                                                                          | <5 years                                 | 191        | 8/101(7.92)                              | 12/90(13.3)                              | -0.048(-0.13, 0.038)    |               |
|                                                                                          | Salivary CRP                             |            |                                          |                                          |                         | 0.671         |
|                                                                                          | Higher                                   | 54         | 1/26(3.85)                               | 5/28(17.9)                               | -0.08(-0.44,0.28)       |               |
|                                                                                          | Lower                                    | 77         | 3/37(8.11)                               | 4/40(10.0)                               | -0.014(-0.16,0.13)      |               |
|                                                                                          | Detection of virus/<br><i>Mycoplasma</i> |            |                                          |                                          |                         | 0.608         |
| Detected                                                                                 | 121                                      | 5/63(7.94) | 5/58(8.62)                               | -0.0068(-0.11, 0.092)                    |                         |               |
| Not detected                                                                             | 51                                       | 3/25(12.0) | 2/26(7.69)                               | 0.043(-0.12,0.21)                        |                         |               |

eTable 4. Subgroup Analyses of Secondary Outcomes (Count)

| COUNT OUTCOMES                                    |                                       |     |                                                 |                                               |                                |                  |
|---------------------------------------------------|---------------------------------------|-----|-------------------------------------------------|-----------------------------------------------|--------------------------------|------------------|
| Outcome                                           | Subgroup                              | N   | Short Course<br>(Intervention)<br>Median(Q1,Q3) | Standard Course<br>(Control)<br>Median(Q1,Q3) | Incident Rate Ratio<br>(95%CI) | Interaction<br>p |
| Caregiver absenteeism<br>(caregiver-days)         | Age                                   |     |                                                 |                                               |                                | <0.001           |
|                                                   | 5-10years                             | 62  | 3 (1, 9)                                        | 3 (0, 6)                                      | 1.47 (1.16,1.87)               |                  |
|                                                   | <5 years                              | 183 | 1 (0, 3)                                        | 3 (1, 7)                                      | 0.57 (0.49,0.66)               |                  |
|                                                   | Salivary CRP                          |     |                                                 |                                               |                                | <0.001           |
|                                                   | Higher                                | 52  | 1 (0, 3)                                        | 4 (1, 9)                                      | 0.57 (0.43,0.75)               |                  |
|                                                   | Lower                                 | 76  | 2 (1, 4)                                        | 3 (0, 7)                                      | 0.98 (0.79,1.23)               |                  |
| Child absenteeism<br>(days)                       | Detection of virus/ <i>Mycoplasma</i> |     |                                                 |                                               |                                | <0.001           |
|                                                   | Detected                              | 114 | 1 (0, 3)                                        | 3 (0, 9)                                      | 0.57 (0.48,0.69)               |                  |
|                                                   | Not detected                          | 48  | 2 (0, 8)                                        | 2 (1, 4)                                      | 1.28 (0.94,1.74)               |                  |
|                                                   | Age                                   |     |                                                 |                                               |                                | 0.535            |
|                                                   | 5-10years                             | 68  | 1 (1, 1)                                        | 1 (1, 1)                                      | 1.15 (0.67,2.09)               |                  |
|                                                   | <5 years                              | 212 | 1 (0,1)                                         | 1 (0, 1)                                      | 0.92 (0.65,1.31)               |                  |
| Mild drug adverse<br>reactions (symptom-<br>days) | Salivary CRP                          |     |                                                 |                                               |                                | 0.361            |
|                                                   | Higher                                | 58  | 0.50 (0, 1)                                     | 1 (1, 1)                                      | 0.69 (0.35,1.35)               |                  |
|                                                   | Lower                                 | 85  | 1 (0, 1)                                        | 1 (0, 1)                                      | 0.99 (0.59,1.67)               |                  |
|                                                   | Detection of virus/ <i>Mycoplasma</i> |     |                                                 |                                               |                                | 0.527            |
|                                                   | Detected                              | 130 | 1 (0, 1)                                        | 1 (0, 1)                                      | 0.80 (0.51,1.27)               |                  |
|                                                   | Not detected                          | 58  | 1 (0, 1)                                        | 0 (0, 1)                                      | 1.12 (0.58,2.15)               |                  |
| Mild drug adverse<br>reactions (symptom-<br>days) | Age                                   |     |                                                 |                                               |                                | 0.218            |
|                                                   | 5-10years                             | 62  | 1 (0, 3)                                        | 1 (0, 3)                                      | 1.15 (0.79,1.65)               |                  |
|                                                   | <5 years                              | 183 | 1 (0, 3)                                        | 1 (0, 3)                                      | 0.86 (0.70,1.05)               |                  |
|                                                   | Salivary CRP                          |     |                                                 |                                               |                                | 0.0487           |
|                                                   | Higher                                | 52  | 1 (0, 4)                                        | 1 (0, 3)                                      | 1.14 (0.79,1.65)               |                  |
|                                                   | Lower                                 | 76  | 1 (0, 3)                                        | 1 (0, 3)                                      | 0.72 (0.52,0.99)               |                  |
|                                                   | Detection of virus/ <i>Mycoplasma</i> |     |                                                 |                                               |                                | 0.148            |

|  |              |     |          |         |                  |  |
|--|--------------|-----|----------|---------|------------------|--|
|  | Detected     | 101 | 1 (0, 3) | 2 (0,4) | 0.80 (0.63,1.03) |  |
|  | Not detected | 38  | 1 (0, 3) | 0 (0,3) | 1.13 (0.76,1.67) |  |
