# Supplementary material
Source: PubMed Central journal article supplement (PMC7941245)
Supplement: jamapediatr-e206735-s003.pdf [file jamapediatr-e206735-s003.pdf]

## Data Sharing Statement

Pernica. Short-Course Antimicrobial Therapy for Pediatric Community-Acquired Pneumonia. *JAMA Pediatr*. Published March 08, 2021.  
doi:10.1001/jamapediatrics.2020.6735

### Data

**Data available:** No

### Additional Information

**Explanation for why data not available:** Data available upon reasonable request.
